# Supplementary figures and images for: Structure and Properties of High-Entropy Boride Ceramics Synthesized by Mechanical Alloying and Spark Plasma Sintering
Source: MDPI journal article supplement (doi:10.3390/ma16206744), 2023-10-18

Figure S1. MA 7.5h  $(\text{TiTaNb})_{0.3}\text{Hf}_{0.35}\text{Zr}_{0.35}\text{B}_2$ .

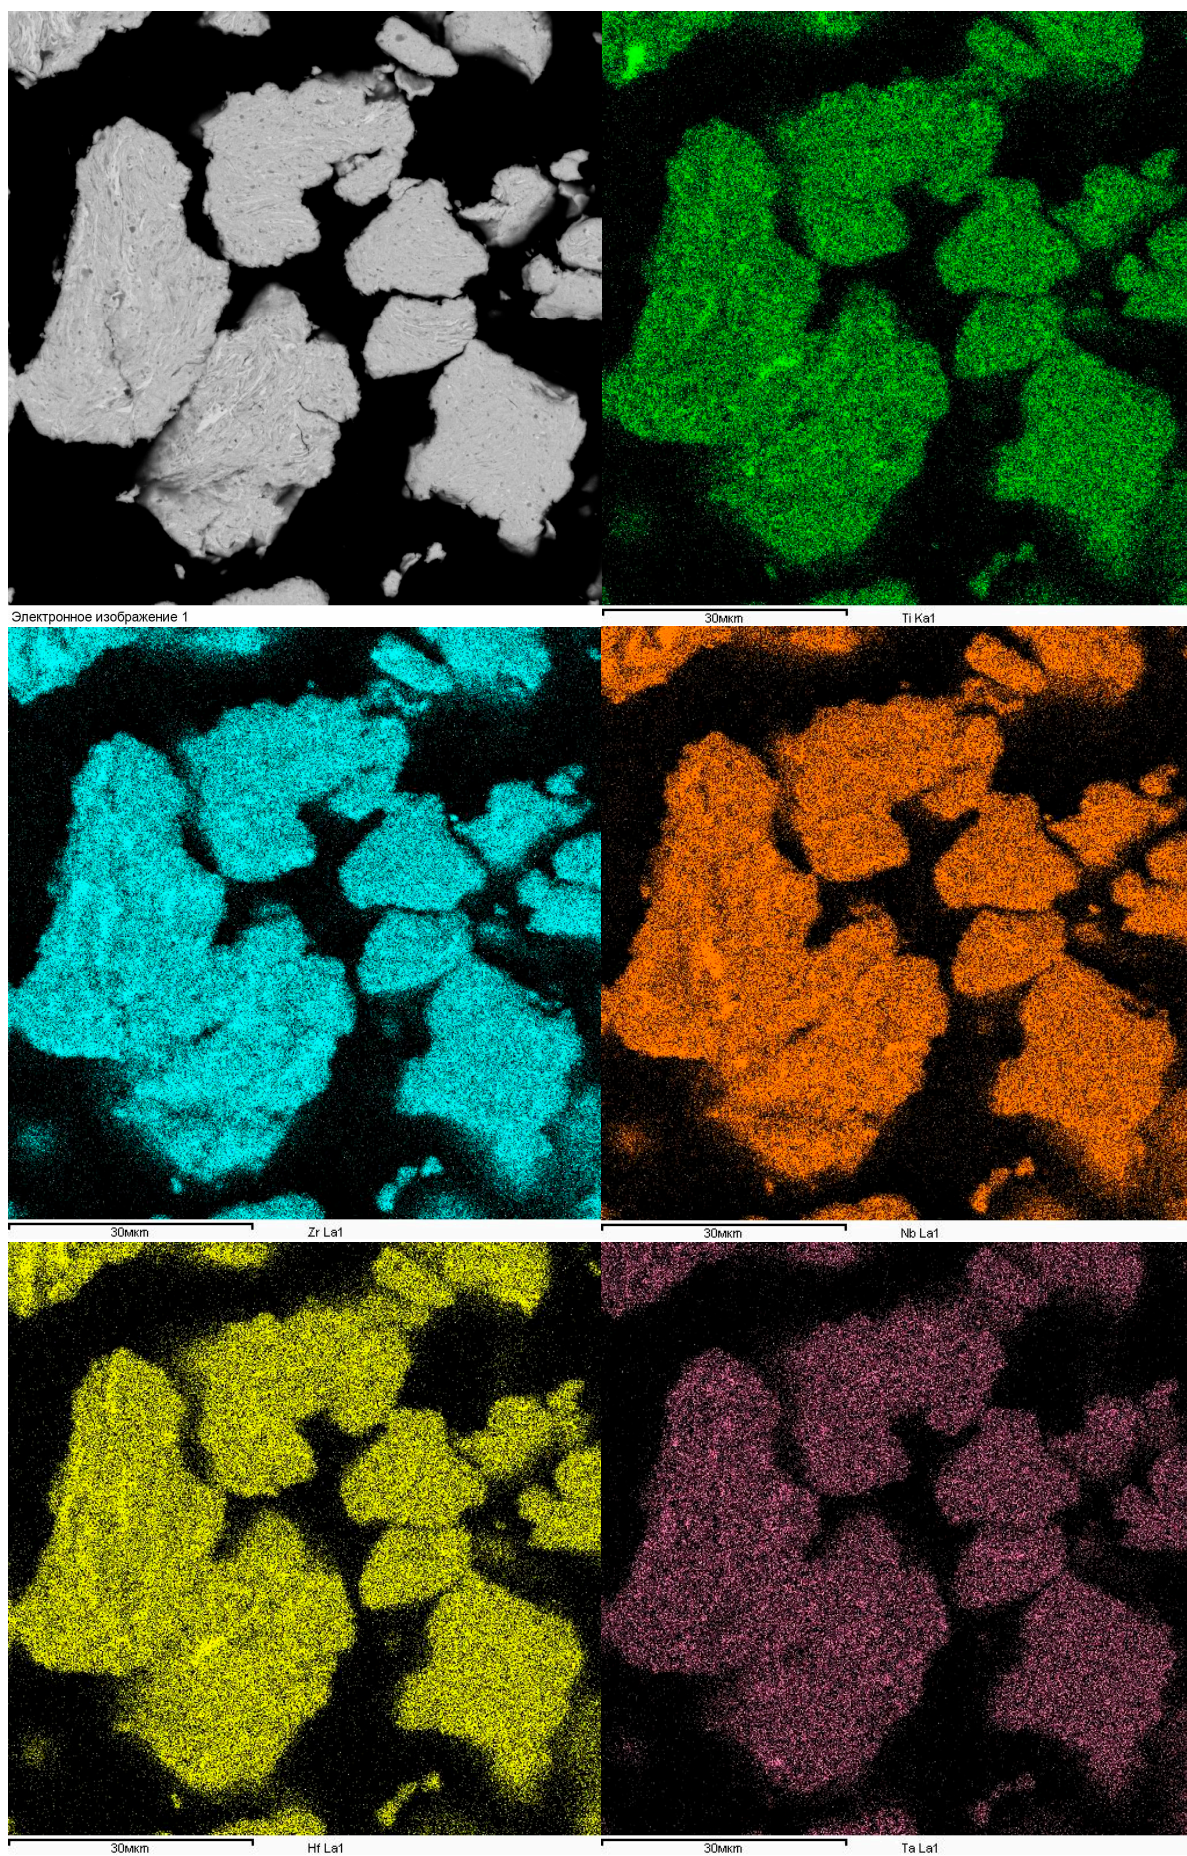

Supplement: s1 [file s1]
